# Supplementary material
Source: Research Square preprint supplement (doi:10.21203/rs.3.rs-9089876/v1)
Supplement: Supplementary file 1 [file 5e0a511d0793b97939618bdb.docx]

**Supplementary (Suppl.) Tables**

| **Suppl 1. Comparison of myocardial perfusion flow between groups during pre-operation and follow-up**（mL/g/min） | | | | | | | |
| --- | --- | --- | --- | --- | --- | --- | --- |
| Groups | **Territory** | pre-rMBF | follow-rMBF | pre-sMBF | follow-sMBF | pre-MFR | follow-MFR |
| **Normal Group** | LAD | 0.95±0.20 | 1.04±0.11** | 1.57±0.55 | 2.56±0.60**** | 1.61±0.28 | 2.45±0.44**** |
| LCX | 0.97±0.21 | 1.04±0.10*** | 1.74±0.68 | 2.54±0.56**** | 1.74±0.37 | 2.43±0.40**** |
| RCA | 0.86±0.20 | 1.02±0.11**** | 1.54±0.72 | 2.47±0.57**** | 1.70±0.40 | 2.40±0.39**** |
| **Reduced Carddiac Function Group** | LAD | 0.81±0.19 | 0.93±0.17 | 1.17±0.44 | 1.98±0.93 | 1.40±0.22 | 2.05±0.66 |
| LCX | 0.79±0.16 | 1.00±0.14 | 1.19±0.38 | 2.30±0.70 | 1.49±0.16 | 2.25±0.44 |
| RCA | 0.71±0.09 | 0.95±0.13 | 1.01±013 | 2.06±0.63 | 1.41±0.09 | 2.13±0.39 |
| **Low -ejection Fraction Group** | LAD | 0.81±0.24# | 0.97±0.12 | 1.15±0.58## | 1.97±0.59**# | 1.36±0.28## | 2.00±0.44***## |
| LCX | 0.80±0.19# | 0.99±0.12** | 1.28±0.57# | 2.17±0.58*** | 1.54±0.31 | 2.16±0.40*** |
| RCA | 0.64±0.18### | 0.96±0.14*** | 0.89±0.44### | 1.93±0.55***# | 1.31±0.28### | 1.98±0.36*** |
| *p<0.05, **p<0.01,***p<0.001 ****p<0.0001 vs Pre; #p<0.05,##p<0.01 ###p<0.001 vs. Normal Group；rMBF(mL/g/min): rest myocardial blood flow; sMBF (mL/g/min): stress myocardial blood flow;MFR: myocardial flow reserve；follow: follow-up of 6 months. | | | | | | | |

| **Suppl.2. Spearman correlation analysis** | | | | | | | | | | | | | | | |
| --- | --- | --- | --- | --- | --- | --- | --- | --- | --- | --- | --- | --- | --- | --- | --- |
|  |  | Pre CMR LVEF | Pre Echo LVEF | Pre Cr | Pre NT-proBNP | Pre HbA1c | Pre rMBF of LAD | Pre sMBF of LAD | Pre MFR of LAD | Pre rMBF of Lcx | Pre sMBF of Lcx | Pre MFR of Lcx | Pre rMBF of Rca | Pre sMBF of Rca | Pre MFR of Rca |
| Pre CMR  LVEF | correlation coefficient | 1 | 0.664 | -0.208 | -0.594 | -0.235 | 0.371 | 0.485 | 0.561 | 0.475 | 0.49 | 0.475 | 0.558 | 0.57 | 0.542 |
| Sig.（double） | . | 0.000 | 0.027 | 0.000 | 0.015 | 0.000 | 0.000 | 0.000 | 0.000 | 0.000 | 0.000 | 0.000 | 0.000 | 0.000 |
| N | 114 | 113 | 113 | 114 | 106 | 113 | 113 | 113 | 113 | 113 | 113 | 113 | 113 | 113 |
| Pre Echo EF | correlation coefficient | 0.664 | 1 | -0.123 | -0.504 | -0.143 | 0.306 | 0.357 | 0.379 | 0.38 | 0.392 | 0.385 | 0.399 | 0.402 | 0.384 |
| Sig.（double） | 0.000 | . | 0.090 | 0.000 | 0.054 | 0.001 | 0.000 | 0.000 | 0.000 | 0.000 | 0.000 | 0.000 | 0.000 | 0.000 |
| N | 113 | 192 | 191 | 192 | 182 | 112 | 112 | 112 | 112 | 112 | 112 | 112 | 112 | 112 |

Pre: pre-operation; CMR: Cardiac Magnetic Resonance; Echo: Echocardiography; LVEF: left ventricular ejection fraction; Cr: Creatinine; HbA1c:glycosylated hemoglobin; rMBF(mL/g/min): rest myocardial blood flow; sMBF (mL/g/min): stress myocardial blood flow;MFR: myocardial flow reserve;LAD:Left Anterior Descending artery; Lcx: circumflex artery; Rca:Right coronary artery.
